# Supplementary material for: Exploration to Identify Radiosensitive Genes in PD-L1 Expression and PD-1 check Point Pathway in Cancer
Source: Research Square preprint supplement (doi:10.21203/rs.3.rs-501265/v1), 2021-05-13
Supplement: Supplementary file 1 [file 1fd9f8fa0793be05ef1d5f50.docx]

**TableS2.** Associations of clinical variables with OS in STAD (total N=367).

|  |  | N | % | HR (95%CI) | *P* |
| --- | --- | --- | --- | --- | --- |
| Radiotherapy* | no | 291 | 79.29 | 1.000 |  |
|  | yes | 76 | 20.71 | 0.418(0.242,0.721) | 0.002 |
| Chemotherapy* | no | 180 | 49.59 | 1.000 |  |
|  | yes | 183 | 50.41 | 0.722(0.494,1.056) | 0.093 |
| Age | >=60 | 250 | 68.68 | 1.000 |  |
|  | <60 | 114 | 31.32 | 0.785(0.534,1.156) | 0.221 |
| Race | white | 237 | 71.17 | 1.000 |  |
|  | others | 96 | 28.83 | 1.404(0.882,2.234) | 0.742 |
| Gender* | male | 239 | 65.12 | 1.000 |  |
|  | female | 128 | 34.88 | 0.767(0.518,1.134) | 0.090 |
| Histology | NOS | 189 | 51.92 | 1.000 |  |
|  | DT/MT/SRT | 96 | 26.37 | 0.685(0.436,1.076) | 0.252 |
|  | PT/TT | 79 | 21.70 | 0.785(0.498,1.236) | 0.629 |
| Residual tumor* | R0 | 307 | 92.75 | 1.000 |  |
|  | R1/R2 | 24 | 7.25 | 2.783(1.648,4.701) | <0.001 |
| Pathological stage | III/IV | 181 | 51.42 | 1.000 |  |
|  | I/II | 171 | 48.58 | 0.785(0.481,1.280) | 0.332 |
| T Stage* | T3/T4 | 265 | 73.00 | 1.000 |  |
|  | T1/T2 | 98 | 27.00 | 0.720(0.446,1.161) | 0.177 |
| N Stage* | N1/N2/N3 | 244 | 68.54 | 1.000 |  |
|  | N0 | 112 | 31.46 | 0.571(0.336,0.972) | 0.039 |
| M Stage | M0 | 336 | 95.18 | 1.000 |  |
|  | T1/T2 | 17 | 4.82 | 1.131(0.568,2.253) | 0.726 |
| Tumor grade | G1/G2 | 138 | 38.55 | 1.000 |  |
|  | G3 | 220 | 61.45 | 0.975(0.608,1.564) | 0.184 |

Abbreviations: NOS: not otherwise specified; DT: diffuse type; MT: mucinous type; SRT: signet ring type; PT: papillary type; TT: tubular type.

*Clinical variables that were left after stepwise multivariate COX regression.
